# Supplementary material for: Critical Care Pain Management: Evaluating Staff Nurses’ Knowledge and Practice in Ventilated Patients at a Tertiary Care Hospital
Source: Research Square preprint supplement (doi:10.21203/rs.3.rs-6777643/v1), 2025-06-27
Supplement: Supplementary file 1 [file b78a06d789935abaed458118.docx]

# **Supplementary File 1: Structured knowledge questionnaire and practice assessment questionnaire**

**Title: "Critical Care Pain Management: Evaluating Staff Nurses’ Knowledge and Practice in Ventilated Patients at a Tertiary Care Hospital"**

## Part-A Socio-Demographic Proforma

Please tick the most appropriate answer among the alternatives.

1) Gender:
a. Male [ ]
b. Female [ ]
c. Transgender [ ]

2) Age(In completed Years)
a. 21 – 30 years [ ]
b. 31 – 40 years [ ]
c. 41 – 50 years [ ]
d. Above 50 years [ ]

3) Professional Qualification:
a. General Nursing Diploma [ ]
b. B.Sc Nursing [ ]
c. M.Sc Nursing [ ]
d. If M.Sc, specialization: __________

4) Job Experience:
a. 6 months to 1 year [ ]
b. 1 – 5 years [ ]
c. 6 – 10 years [ ]
d. Above 10 years [ ]

5) Years of Experience in ICU:
a. <1 year [ ]
b. 1 – 5 years [ ]
c. 6 – 10 years [ ]
d. Above 10 years [ ]

6) Shift of Work:
a. Day only [ ]
b. Night only [ ]
c. Rotating shift [ ]

7) Working Area:
a. Medical ICU [ ]
b. Surgical ICU [ ]
c. Gastro ICU [ ]
d. Others __________

8) Position:
a. Sister In-charge [ ]
b. Staff Nurse [ ]

9) Workload:
a. Yes [ ]
b. No [ ]

10) Monthly Income:
a. Below Rs.. 10,000 [ ]
b. Rs 10,000 – Rs.30,000 [ ]
c. Above Rs.31,000 [ ]

## Part-B Structured Knowledge Questionnaire

This self-structured questionnaire consists of 10 questions related to the knowledge of managing pain among staff nurses caring for ventilated patients. Read each statement and mark the appropriate response. Choose the option (Yes/No) that best represents your view.

1) Vital signs are reliable indicators of pain intensity.
a. Yes [ ]
b. No [ ]

2) Patients who can be distracted from pain don’t have severe pain.
a. Yes [ ]
b. No [ ]

3) Patients may sleep despite severe pain.
a. Yes [ ]
b. No [ ]

4) Combining analgesics can result in better pain control with fewer side effects than using a single analgesic agent.
a. Yes [ ]
b. No [ ]

5) Can you understand the pain level from the patient’s facial expression?
a. Yes [ ]
b. No [ ]

6) Do you think psychological support is needed during pain?
a. Yes [ ]
b. No [ ]

7) Can positioning reduce the pain to some extent?
a. Yes [ ]
b. No [ ]

8) Do you think elderly patients can tolerate opioids?
a. Yes [ ]
b. No [ ]

9) Opioids should not be used in patients with a history of substance abuse.
a. Yes [ ]
b. No [ ]

10) Is suctioning every 30 minutes helpful to reduce excessive mucus production causing pain in ventilated patients?
a. Yes [ ]
b. No [ ]

Scoring: Yes = 2, No = 1

Total Score: 20

Knowledge Level Classification:
- Poor Knowledge: 1–6
- Average Knowledge: 7–13
- Good Knowledge: 14–20

Part -C Structured Practice Assessment Questionnaire

This self-structured questionnaire consists of 10 questions related to the practice of managing pain among staff nurses caring for ventilated patients. Read each statement and mark the appropriate response. Choose the option (Always/Sometimes/Never) that best represents your practice.

1) Discussing pain ratings and management during patient handover:
a. Always [ ]
b. Sometimes [ ]
c. Never [ ]

2) Using pain assessment tools:
a. Always [ ]
b. Sometimes [ ]
c. Never [ ]

3) Document outcomes after assessing patient’s pain:
a. Always [ ]
b. Sometimes [ ]
c. Never [ ]

4) Assess for intermittent pain:
a. Always [ ]
b. Sometimes [ ]
c. Never [ ]

5) Monitor the cough pressure of ventilated patients every 24 hours:
a. Always [ ]
b. Sometimes [ ]
c. Never [ ]

6) Check the pain level of patients with prolonged insertion of IV cannula:
a. Always [ ]
b. Sometimes [ ]
c. Never [ ]

7) Assess vital signs of the patient:
a. Always [ ]
b. Sometimes [ ]
c. Never [ ]

8) Observe the catheter insertion site for bleeding or hematoma:
a. Always [ ]
b. Sometimes [ ]
c. Never [ ]

9) Avoid encouraging the patient to cough if there is chest discomfort:
a. Always [ ]
b. Sometimes [ ]
c. Never [ ]

10) Change the patient’s position to reduce pain to some extent:
a. Always [ ]
b. Sometimes [ ]
c. Never [ ]

Scoring: Always = 3, Sometimes = 2, Never = 1

Total Score: 30

Practice Level Classification:
- Poor Practice: 1–10
- Average Practice: 11–20
- Good Practice: 21–30
